# Supplementary material for: Neolignans isolated from Saururus cernuus L. (Saururaceae) exhibit efficacy against Schistosoma mansoni
Source: PubMed Central journal article supplement (PMC9652300; doi:10.1038/s41598-022-23110-2), 2022-11-11
Supplement: 41598_2022_23110_MOESM1_ESM.pdf [file 41598_2022_23110_MOESM1_ESM.pdf]

# ***Threo*-austrobailignan-6 and verrucosin, two neolignans isolated from *Saururus cernuus* L. (Saururaceae), exhibit efficacy against *Schistosoma mansoni***

Juliana R. Brito<sup>1</sup>, Daniel B. Roquini<sup>2</sup>, Beatriz C. Parra<sup>2</sup>, Marina M. Gonçalves<sup>3</sup>, Dalete Christine S. Souza<sup>3</sup>, Edgard A. Ferreira<sup>4</sup>, Maria C. Salvadori<sup>5</sup>, Fernanda S. Teixeira<sup>5</sup>, Polrat Wilairatana<sup>6,\*</sup>, João Henrique G. Lago<sup>3,\*</sup>, Josué de Moraes<sup>2,\*</sup>

<sup>1</sup>Institute of Environmental, Chemical and Pharmaceutical Sciences, Federal University of São Paulo, Diadema, SP, 09972-270, Brazil

<sup>2</sup>Research Center on Neglected Diseases, Guarulhos University, Guarulhos, SP, 07023-070, Brazil

<sup>3</sup>Center for Natural and Human Sciences, Federal University of ABC, Santo André, SP, 09210-180, Brazil

<sup>4</sup>School of Engineering, Mackenzie Presbyterian University, São Paulo, SP, 01302-907, Brazil

<sup>5</sup>Institute of Physics, University of São Paulo, São Paulo, SP, 05508-090, Brazil

<sup>6</sup>Department of Clinical Tropical Medicine, Faculty of Tropical Medicine, Mahidol University, Bangkok 10400, Thailand

\*Corresponding authors: joao.lago@ufabc.edu.br (J.H.G.L.); polrat.wil@mahidol.ac.th (P.W.); moraesnpdn@gmail.com (J.d.M.).

## Supplementary Information

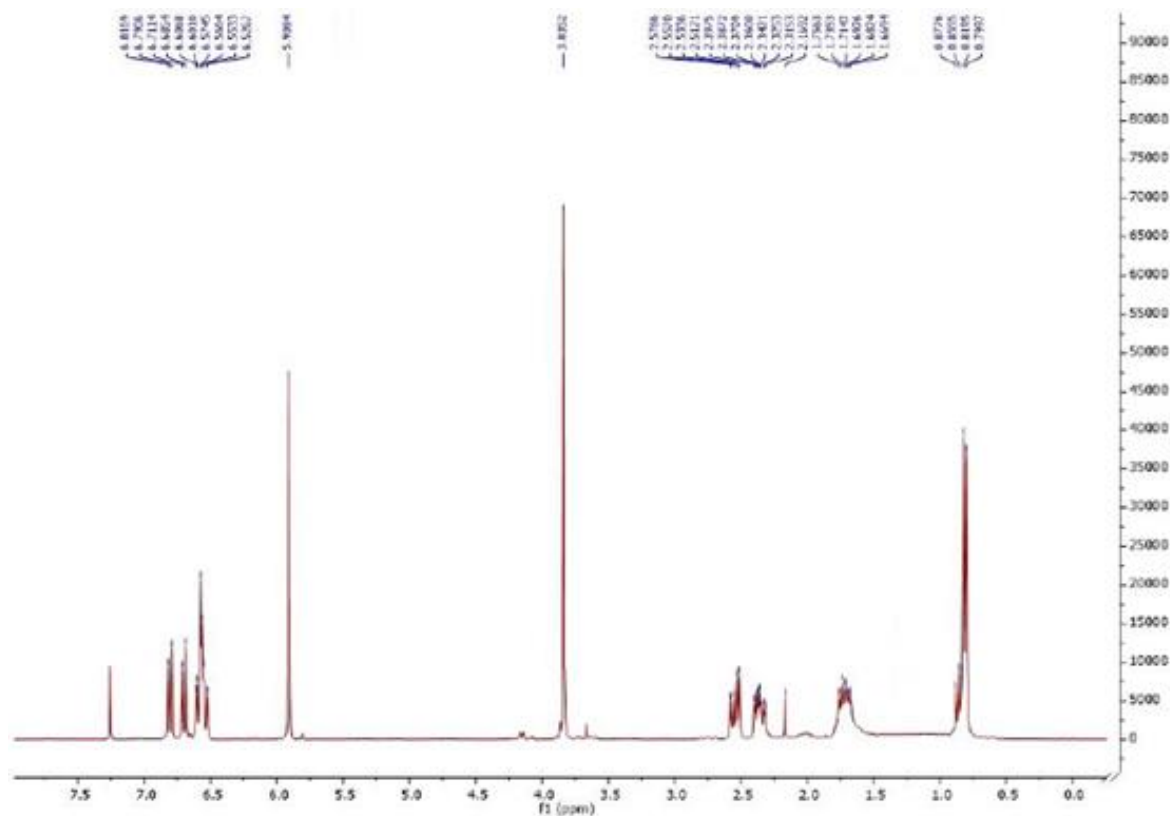

**Figure S1.** <sup>1</sup>H NMR spectrum of *threo*-austrobailignan-6 ( $\delta$ , CDCl<sub>3</sub>, 300 MHz).

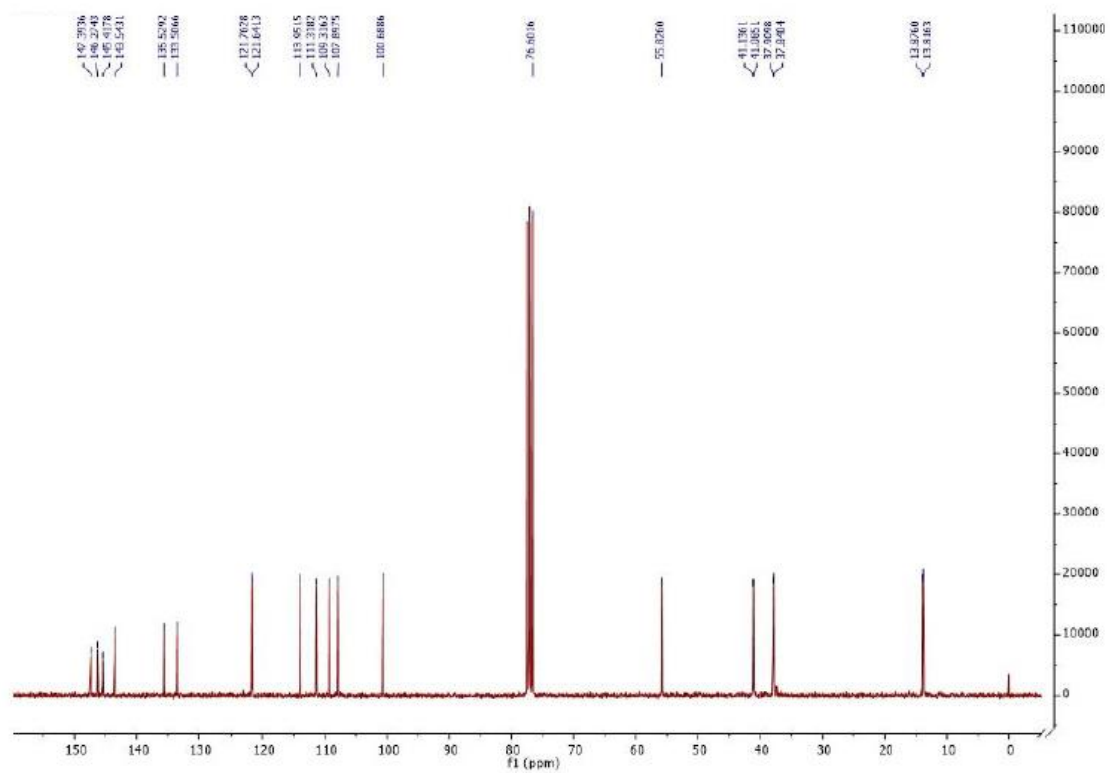

**Figure S2.**  $^{13}\text{C}$  NMR spectrum of *threo*-austrobailignan-6 ( $\delta$ ,  $\text{CDCl}_3$ , 75 MHz).

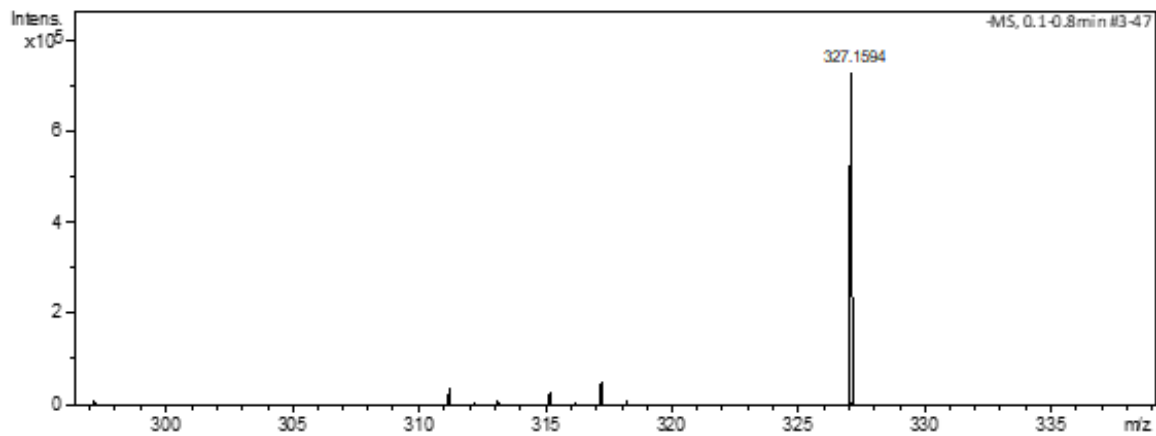

**Figure S3.** ESI-HRMS spectrum of *threo*-austrobailignan-6 (negative mode).

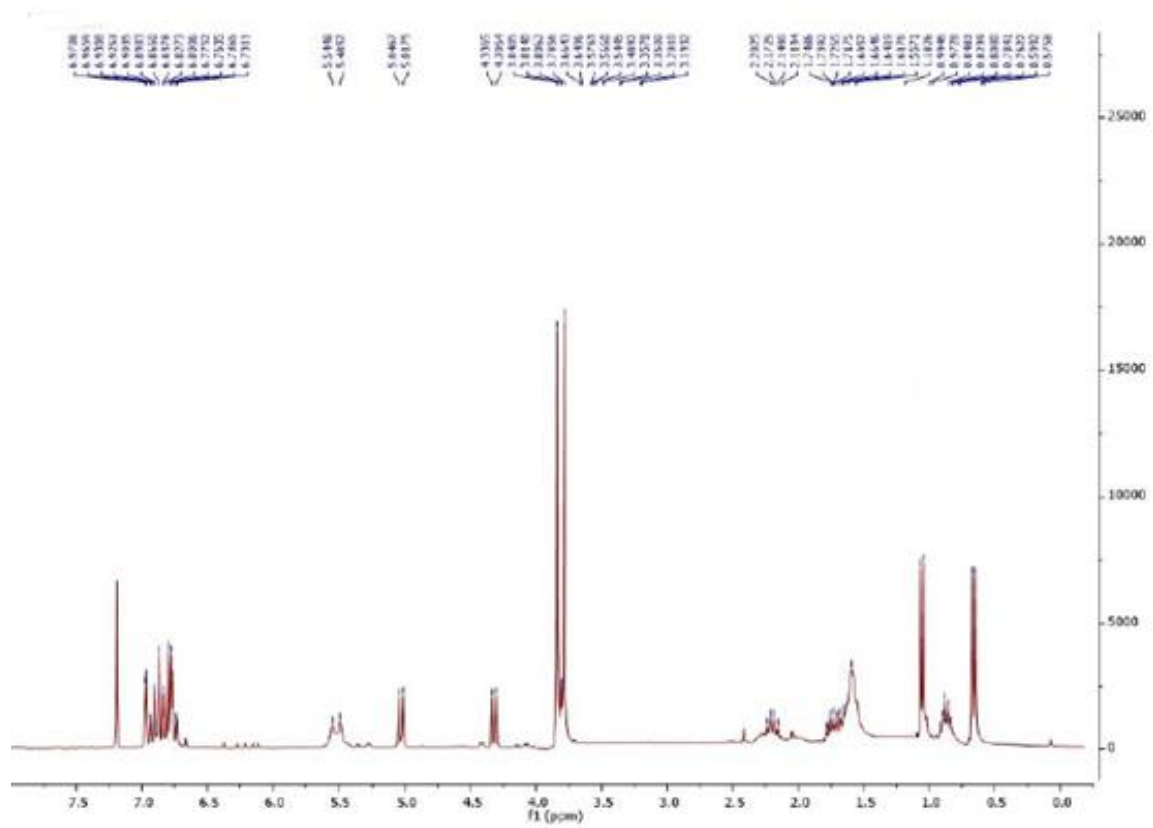

**Figure S4.**  $^1\text{H}$  NMR spectrum of verrucosin ( $\delta$ ,  $\text{CDCl}_3$ , 300 MHz)

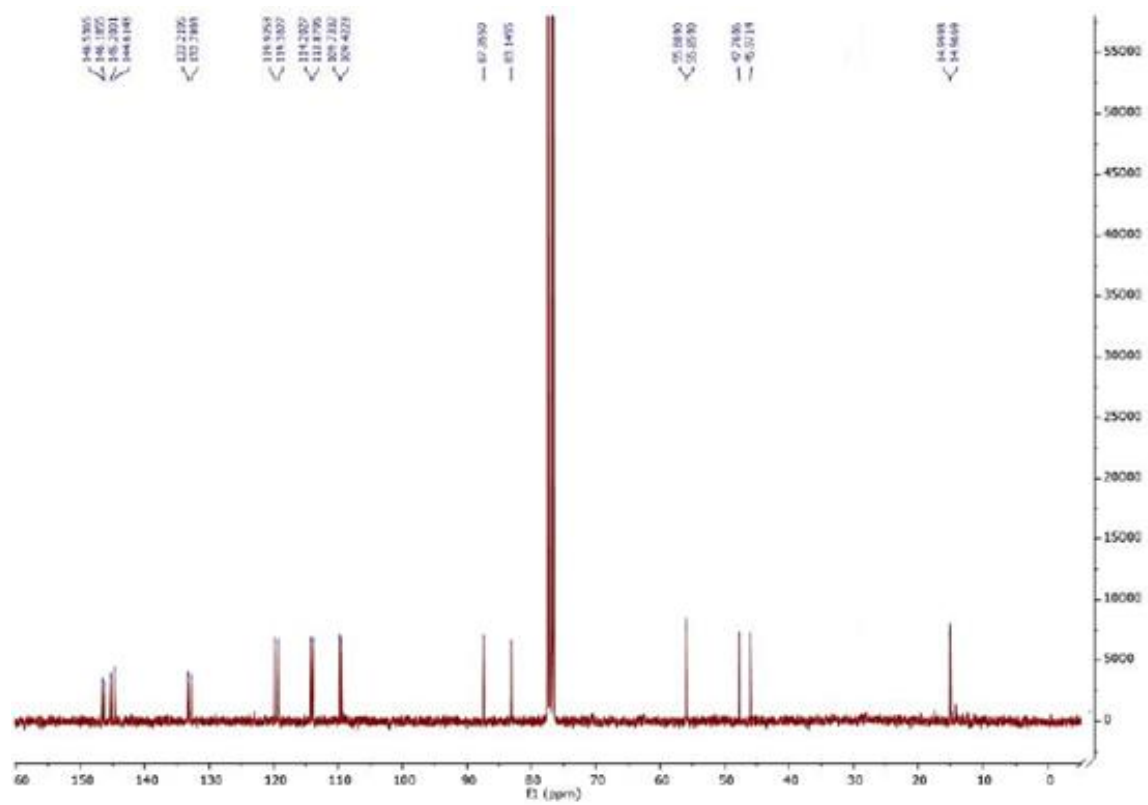

**Figure S5.**  $^{13}\text{C}$  NMR spectrum of verrucosin ( $\delta$ ,  $\text{CDCl}_3$ , 75 MHz)

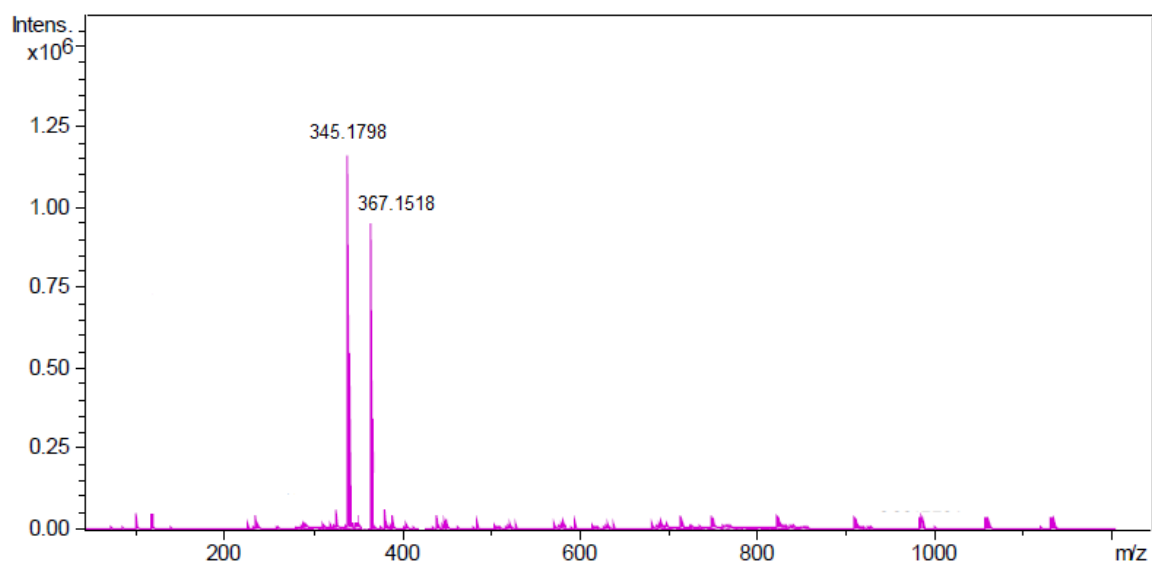

**Figure S6.** ESI-HRMS spectrum of verrucosin (positive mode).
